# Supplementary material for: Dynamics of Tribofilm Formation in Boundary Lubrication Investigated Using In Situ Measurements of the Friction Force and Contact Voltage
Source: MDPI journal article supplement (doi:10.3390/ma17061335), 2024-03-14
Supplement: s1 [file s1]

# Supplementary Material

## I. Coefficient of friction and contact voltage

Statistical results of the coefficient of friction and contact voltage for various blends and loads are given below. Error bars indicate one standard deviation above and below each data point representing the average of five measurements obtained from 50 m sliding distance intervals.

### Blend 1 (base oil)

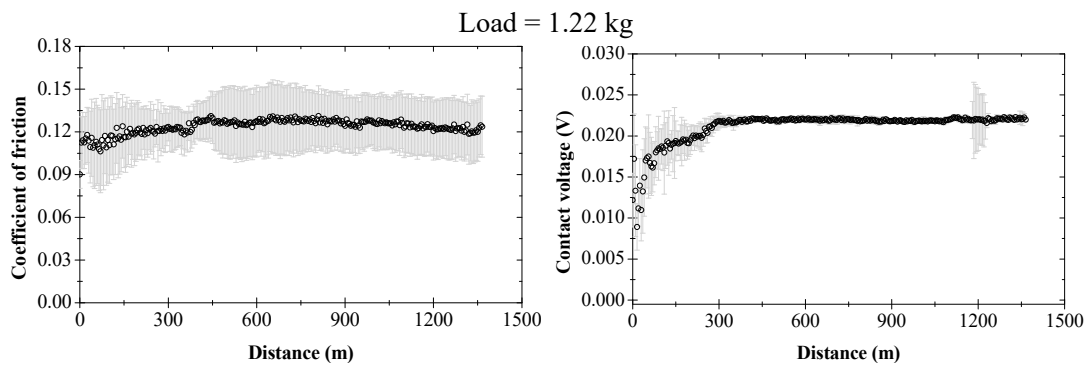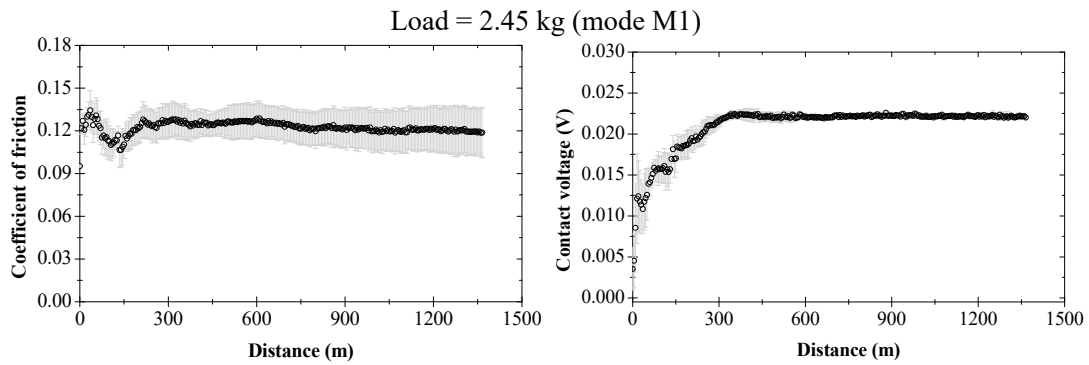

Load = 2.45 kg (mode M2)

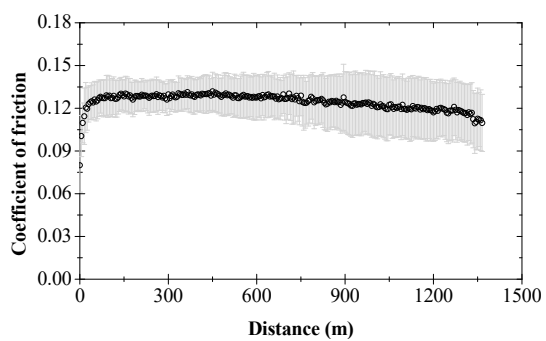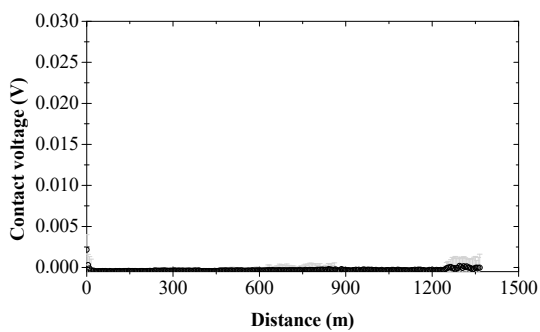

Load = 5.02 kg

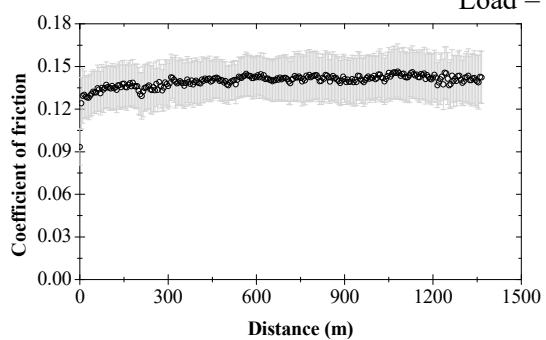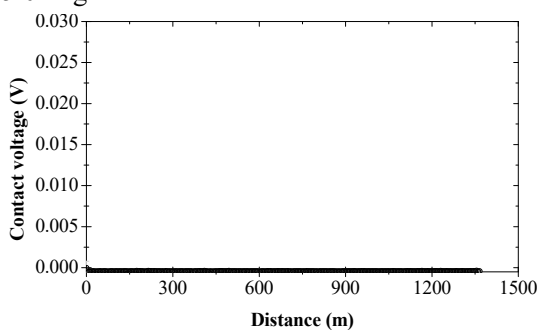

Load = 7.49 kg

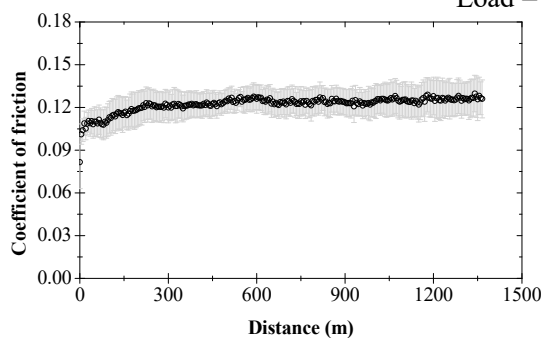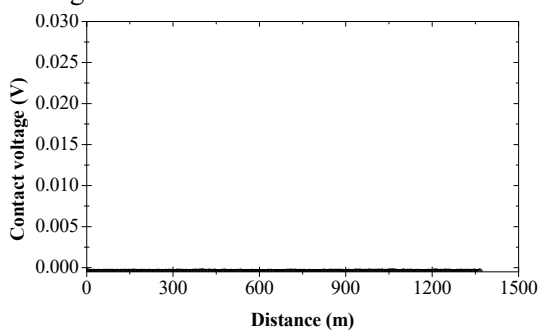

Load = 10.15 kg

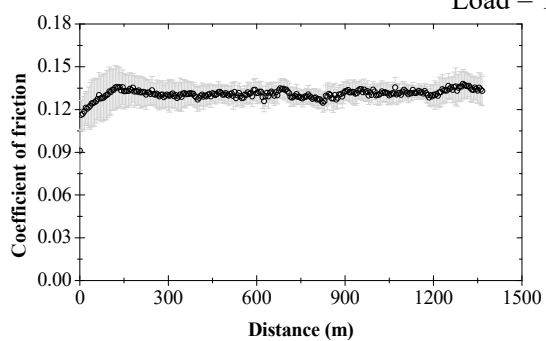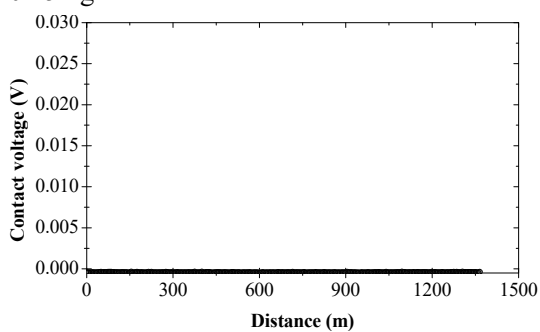

**Blend 2 (base oil + 0.05% ZDDP)**

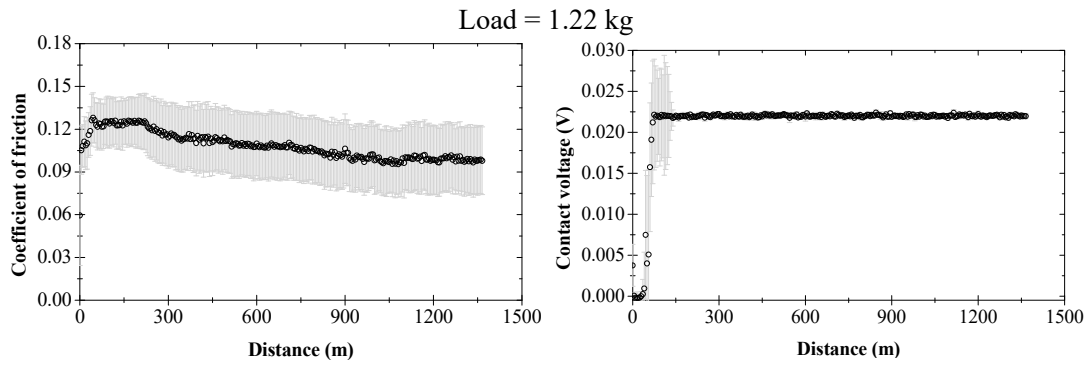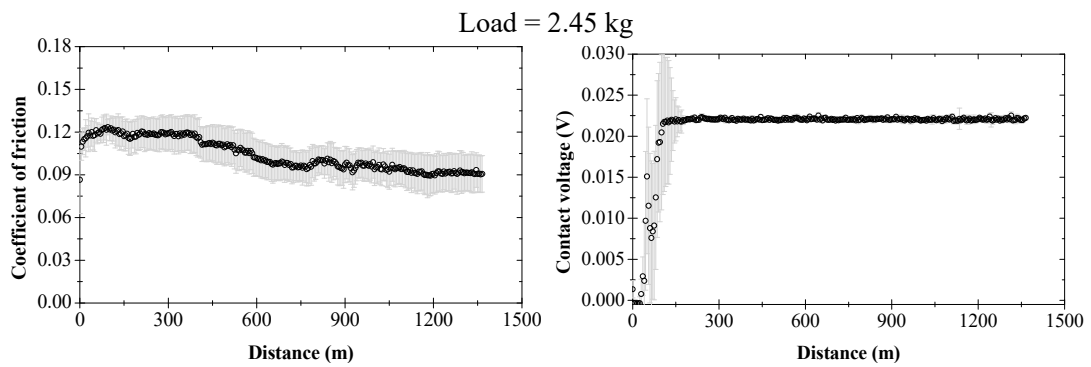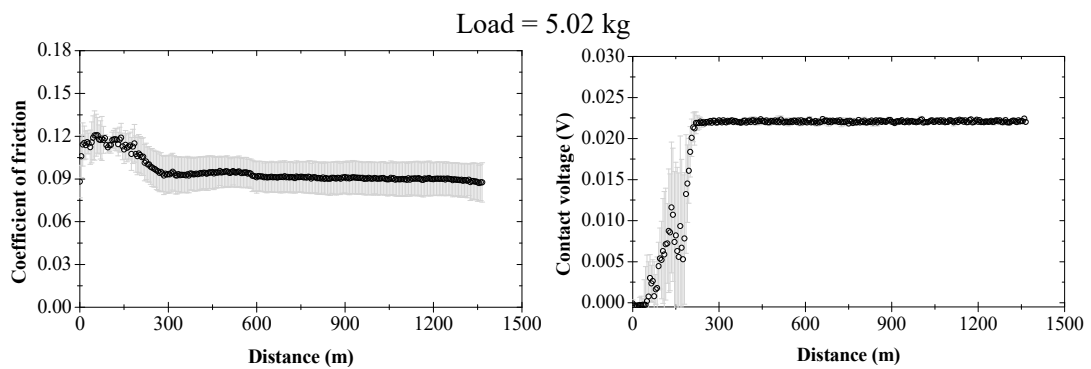

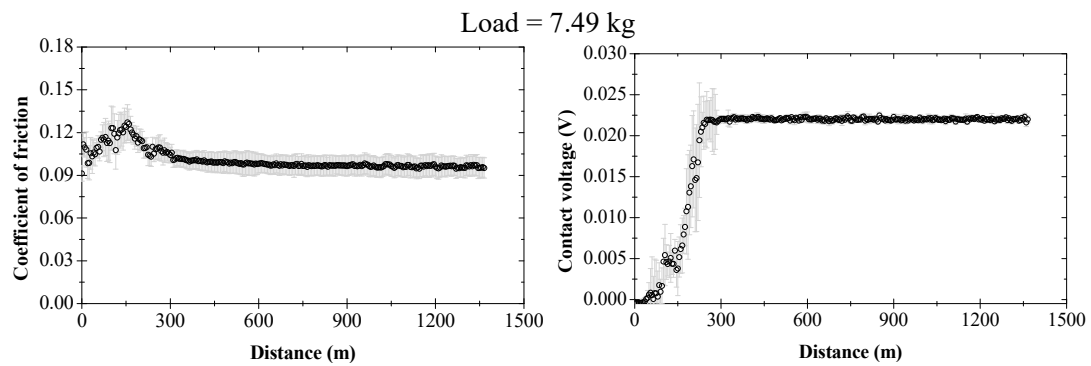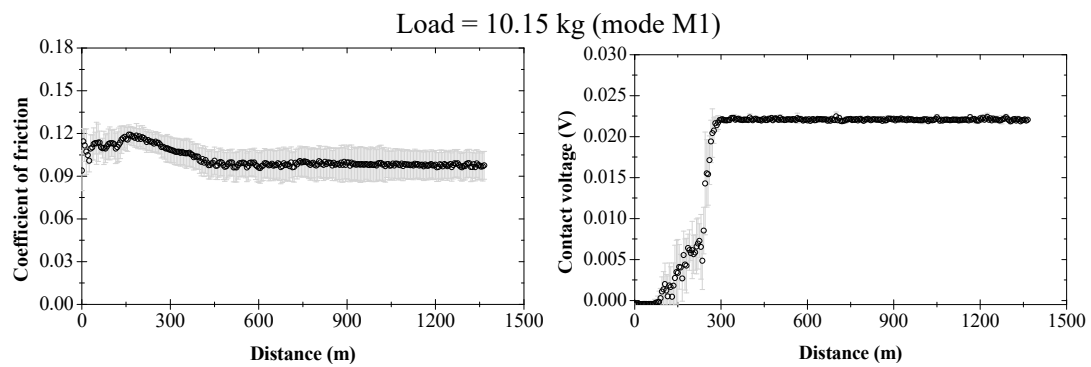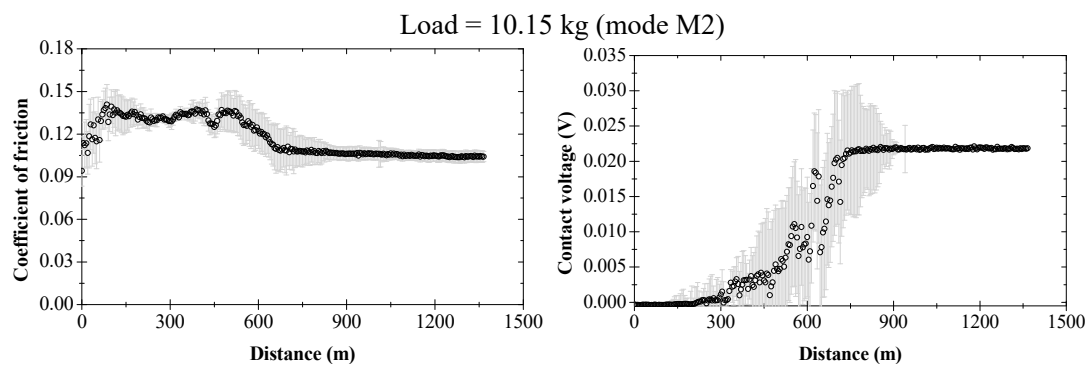

**Blend 3 (base oil + 0.08% ZDDP)**

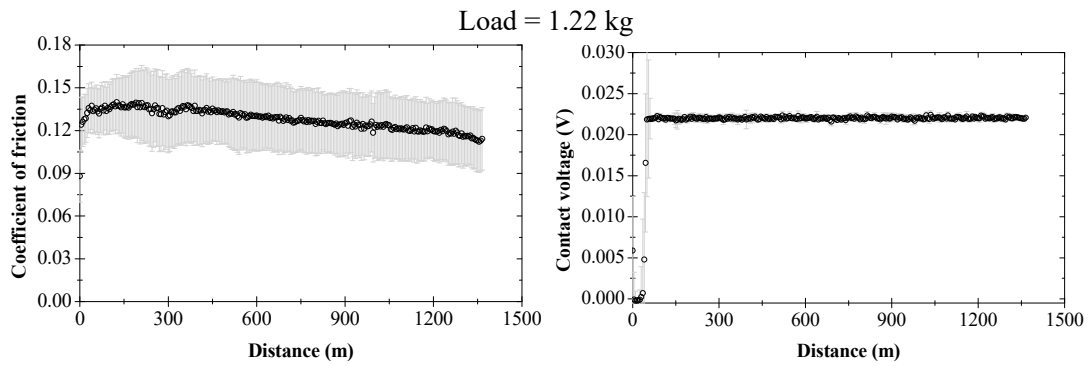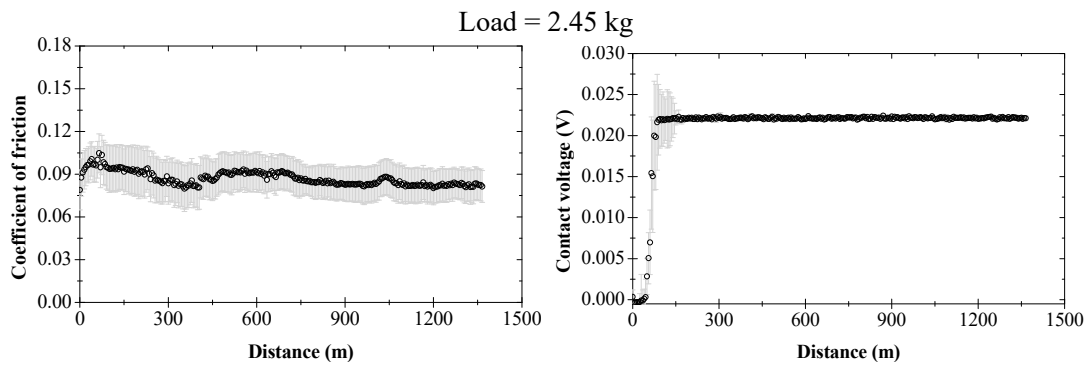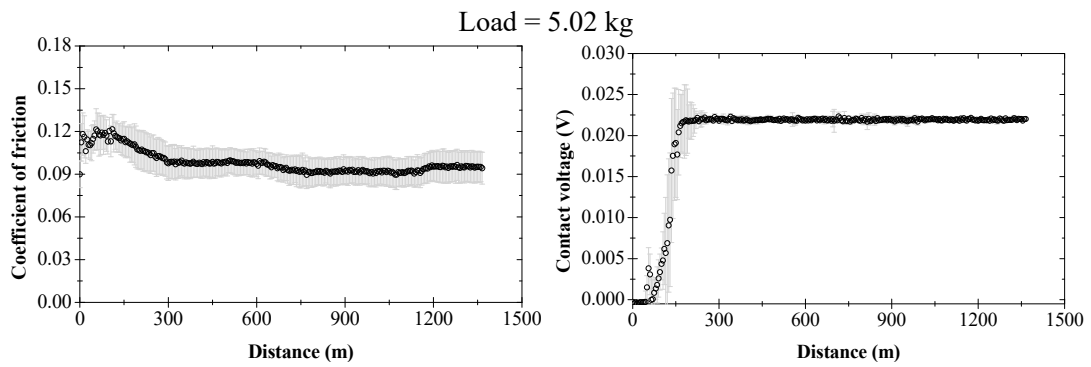

Load = 7.49 kg

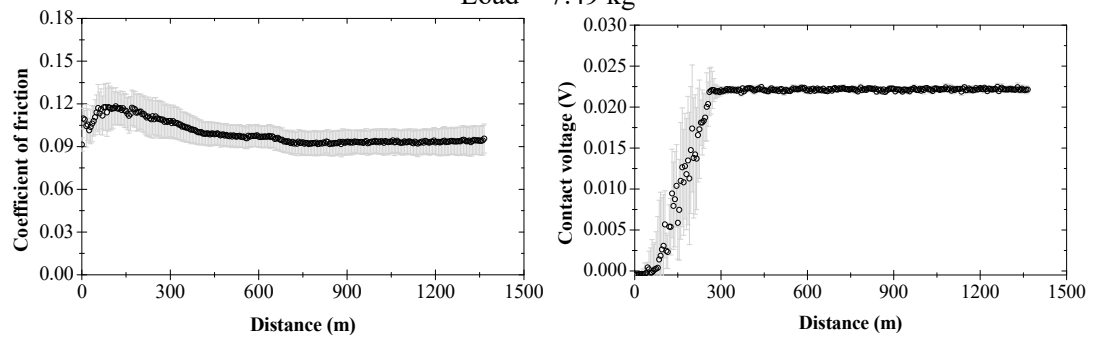

Load = 10.15 kg

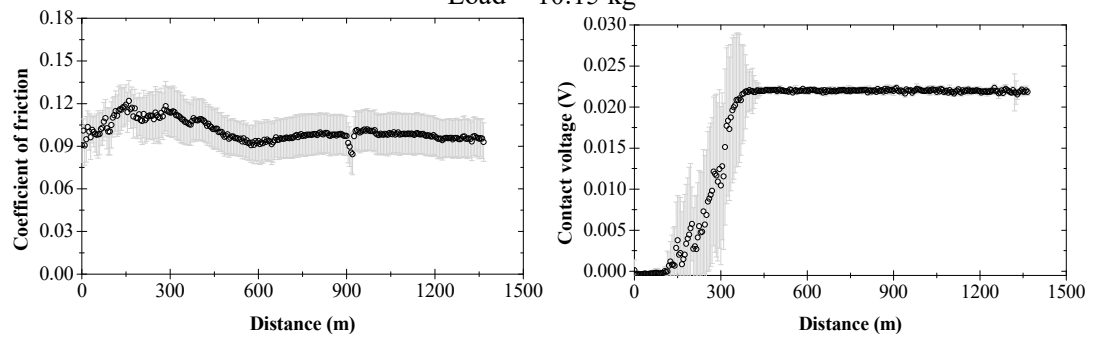

**Blend 4 (base oil + 0.1% dispersant A)**

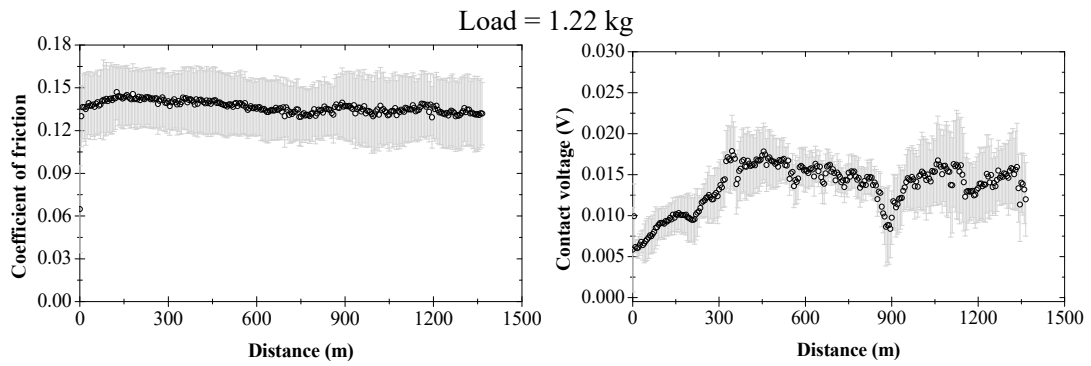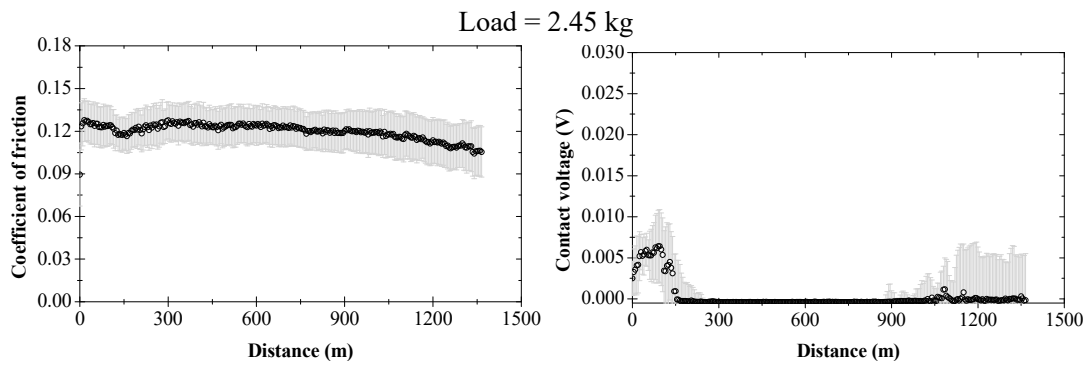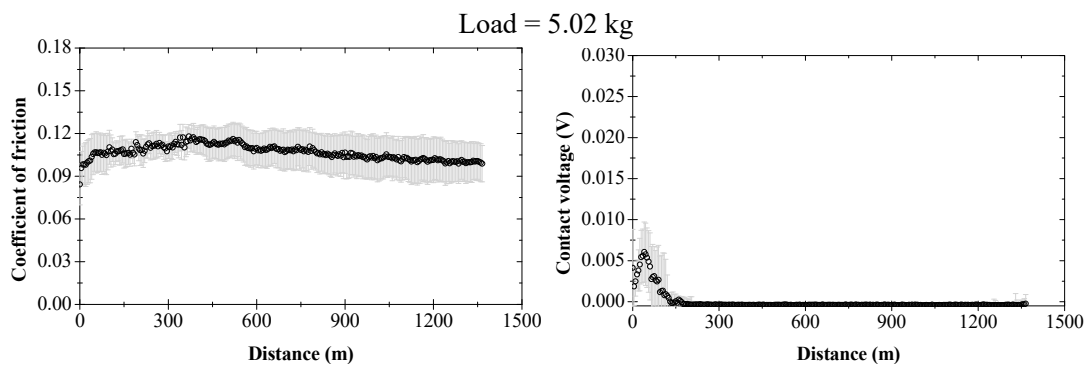

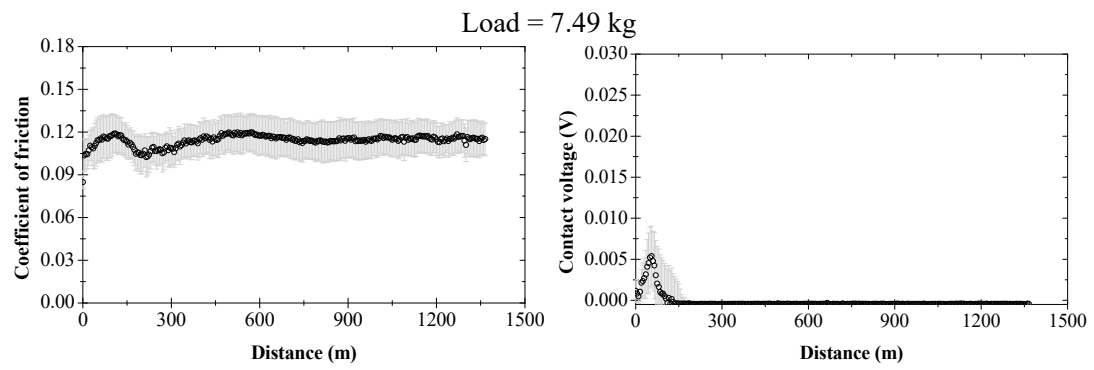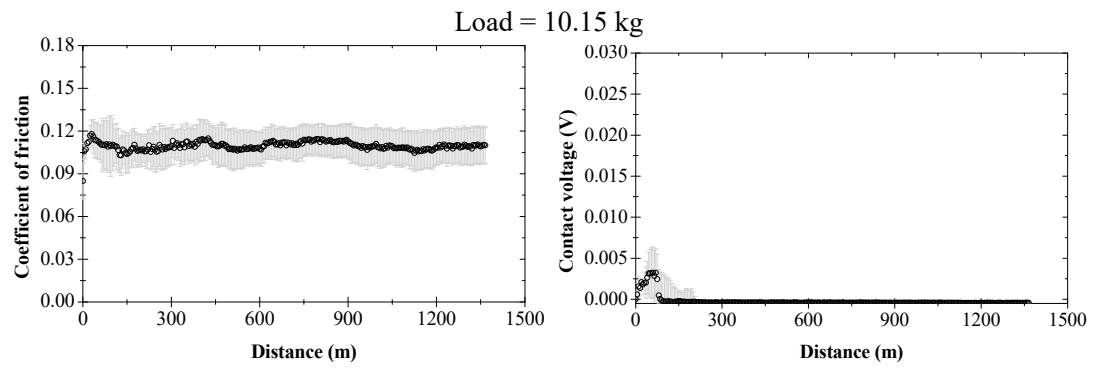



**Blend 5 (base oil + 0.1% dispersant B)**

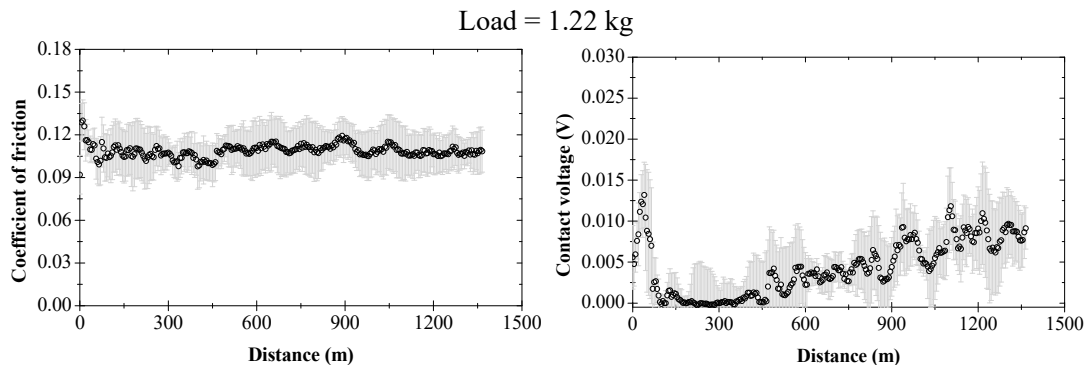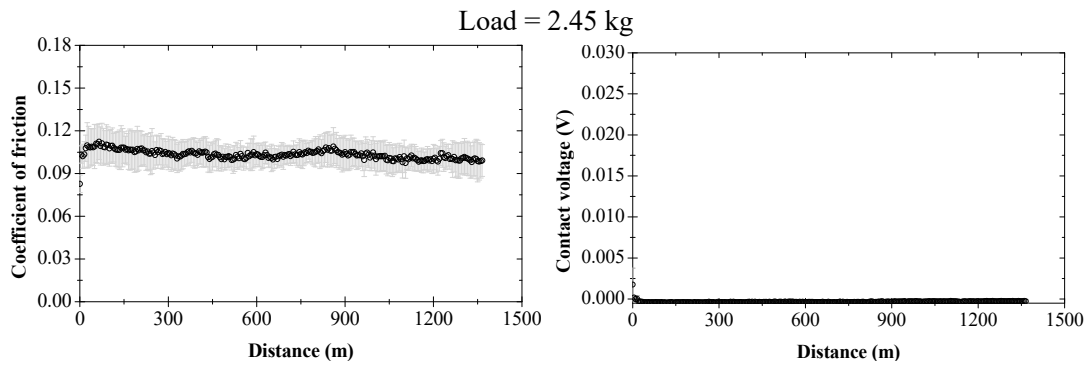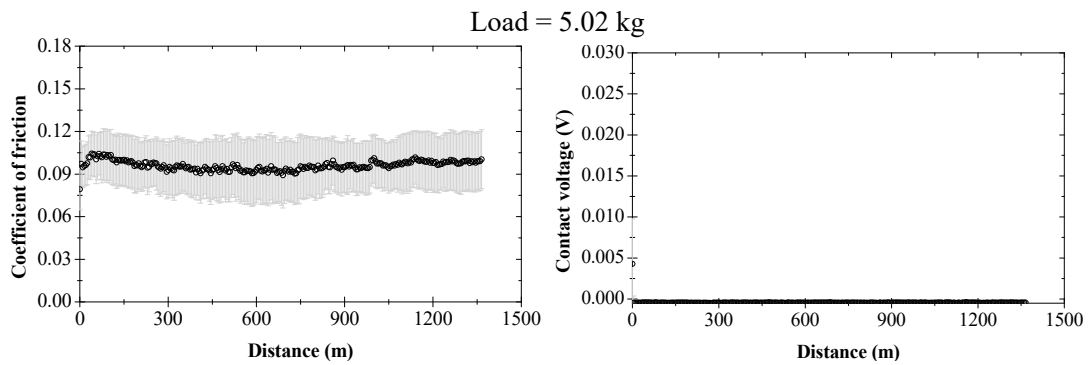

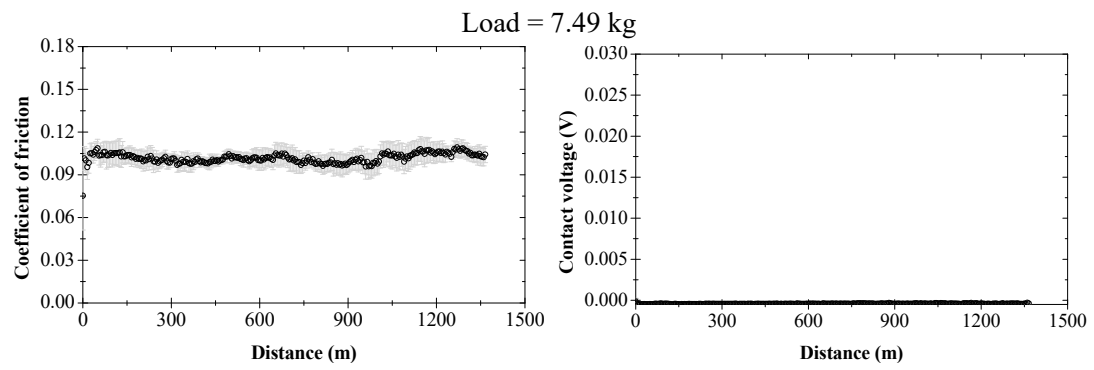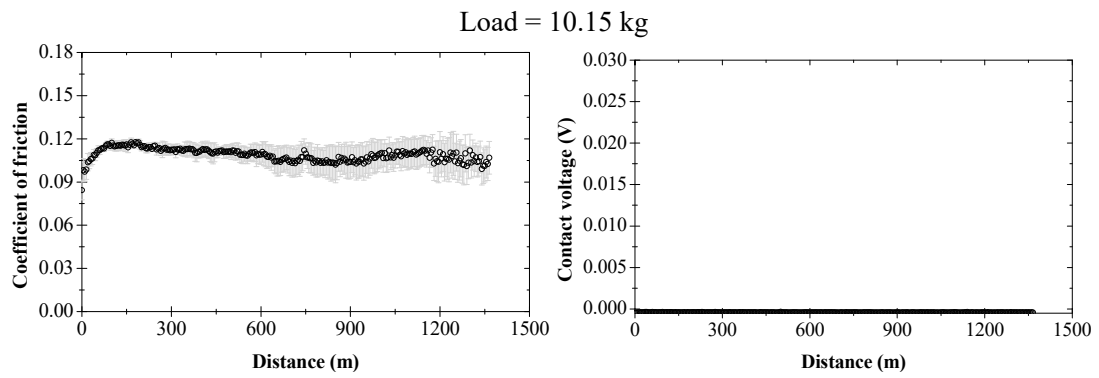

**Blend 6 (base oil + 0.05% ZDDP + 0.1% dispersant A)**

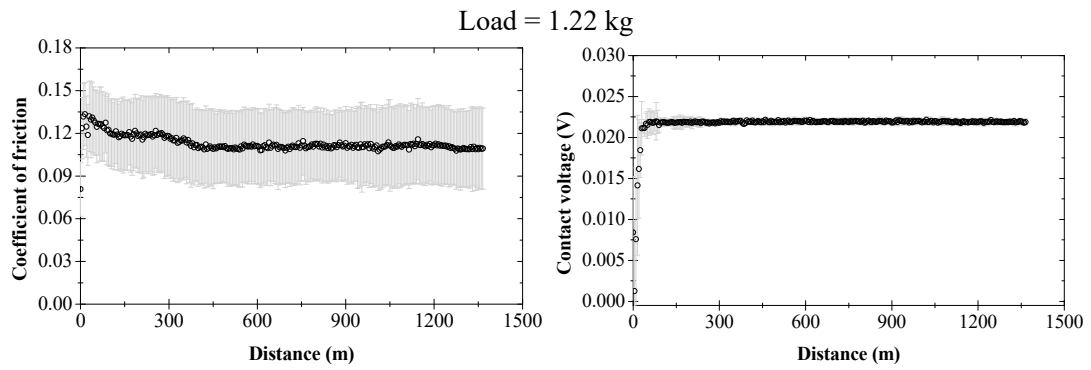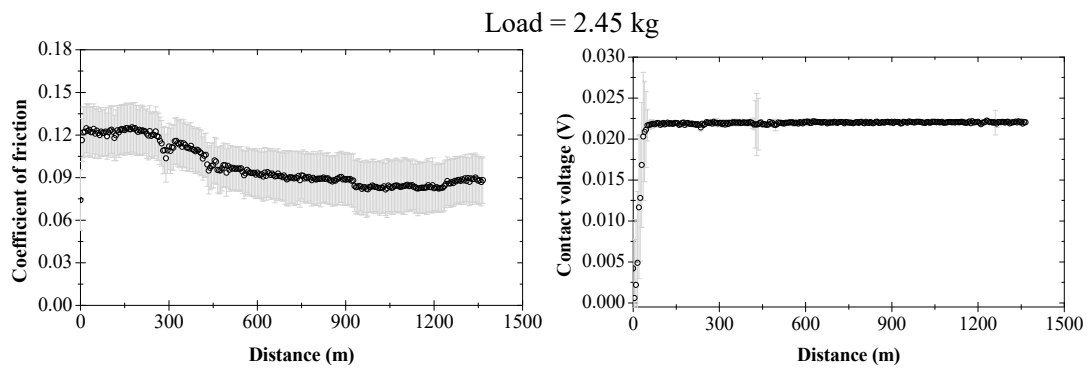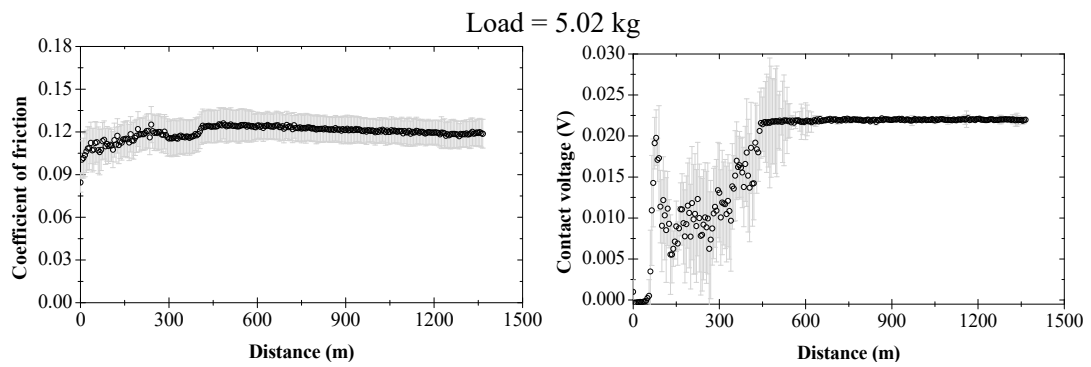

Load = 7.49 kg (mode M1)

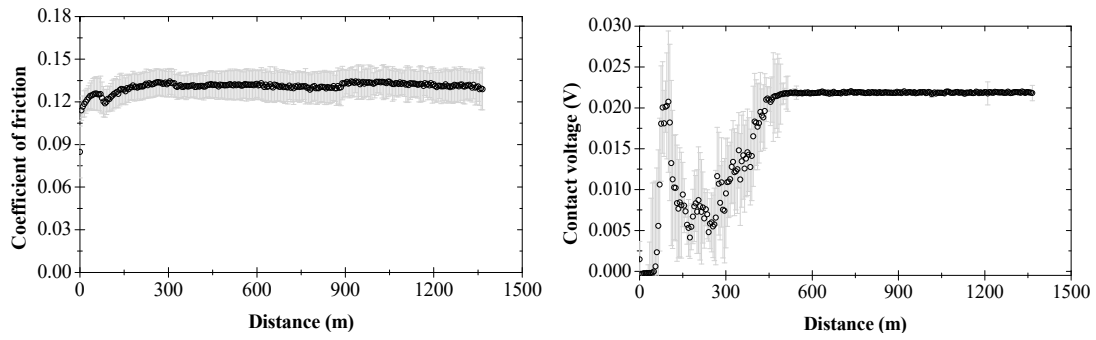

Load = 7.49 kg (mode M2)

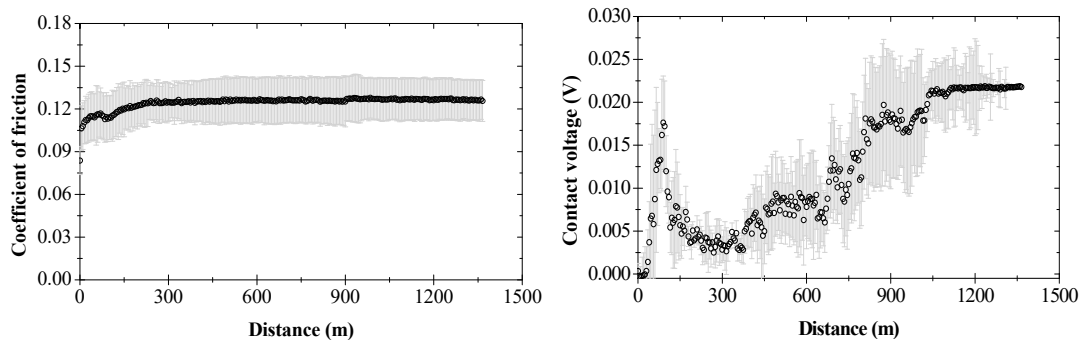

Load = 10.15 kg

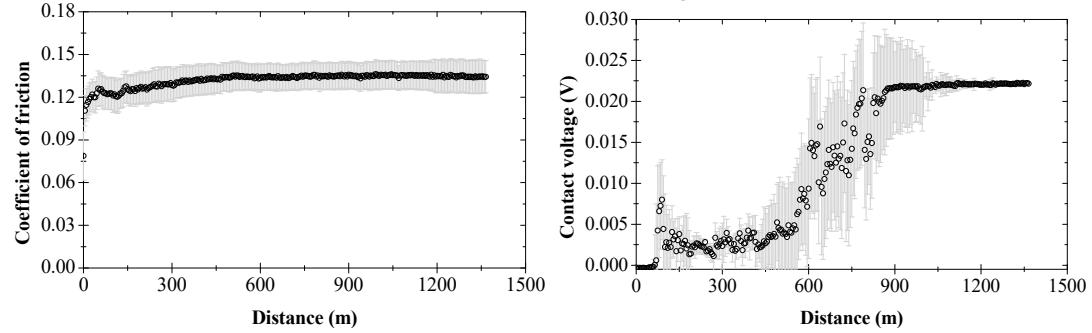

**Blend 7 (base oil + 0.05% ZDDP + 0.1% dispersant B)**

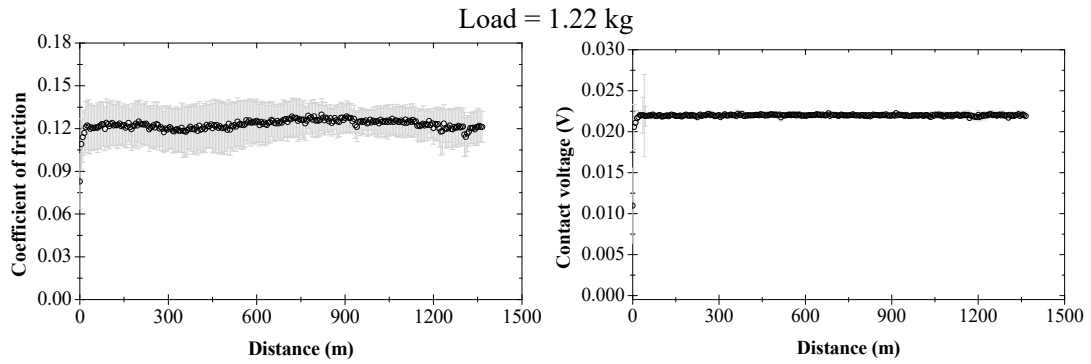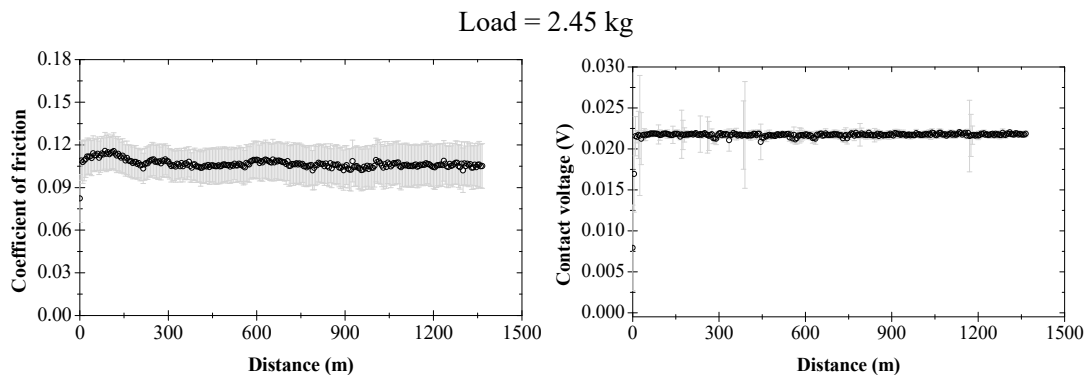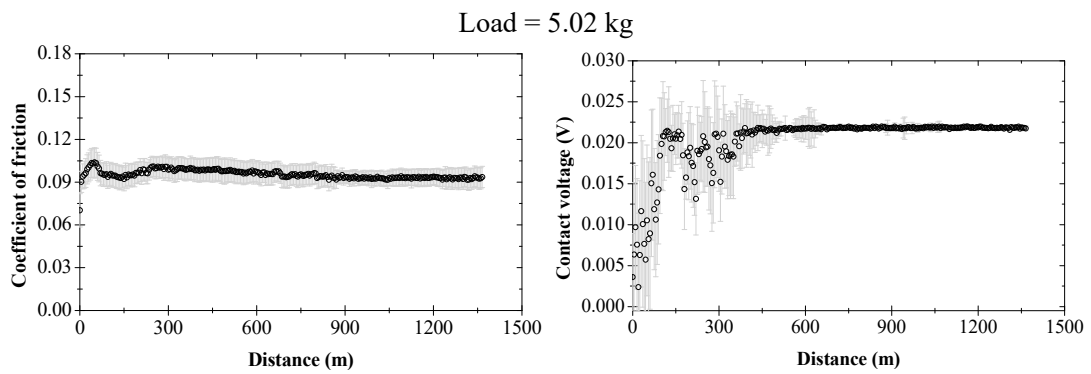

Load = 7.49 kg (mode M1)

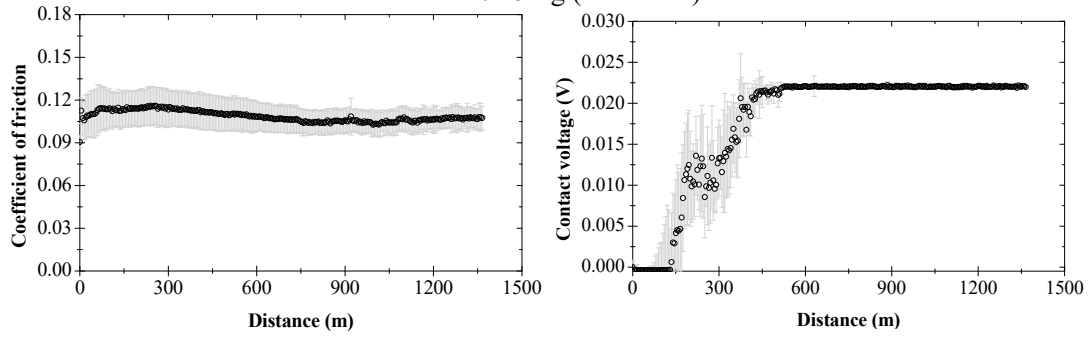

Load = 7.49 kg (mode M2)

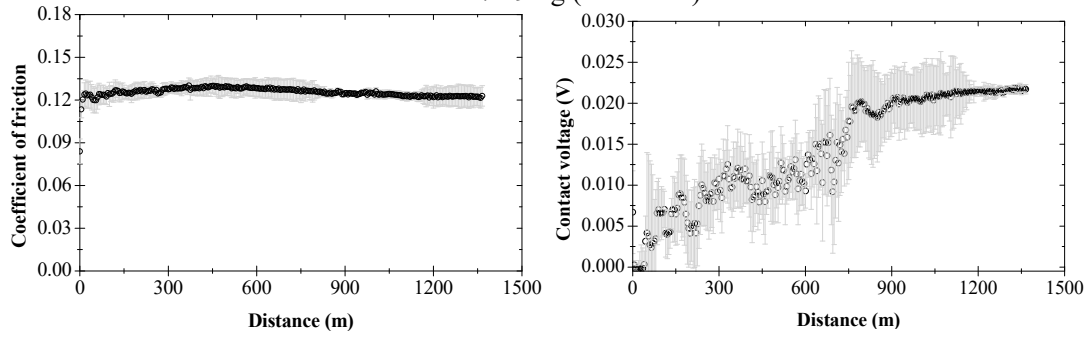

Load = 10.15 kg (mode M1)

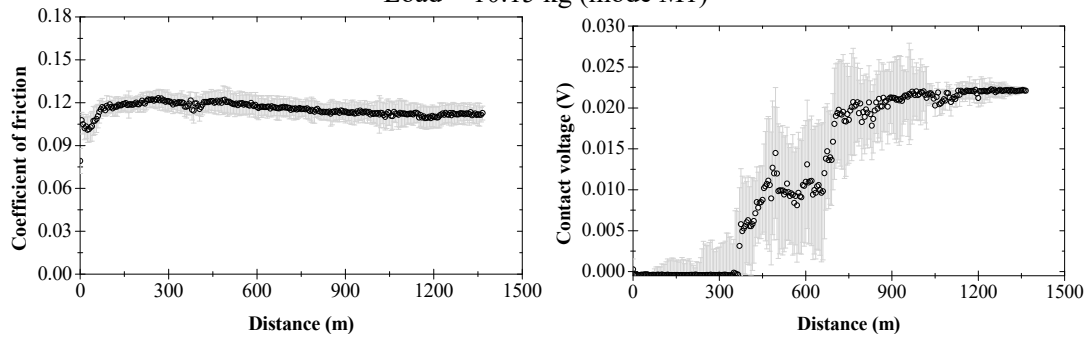

Load = 10.15 kg (mode M2)

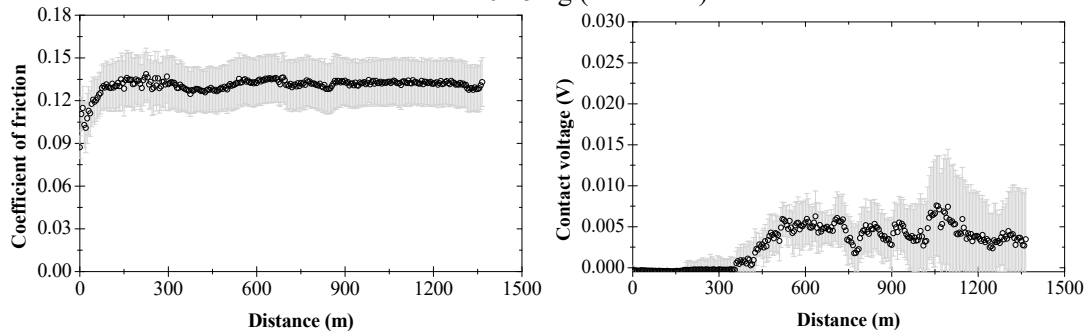

## II. Characteristic distances of the evolution of tribofilm formation

Statistical results of the incubation, transient (transition), and film formation (steady state) distances for tribofilm formation by different blends at various loads derived from contact voltage measurements are given below.

|         | Load (kg) | Mode | Incubation Distance (m) |   |       | Transition Distance (m) |   |       | Film Formation Distance (m) |   |       |
|---------|-----------|------|-------------------------|---|-------|-------------------------|---|-------|-----------------------------|---|-------|
| Blend 1 | 1.22      | --   | 6.0                     | ± | 6.5   | 281.0                   | ± | 98.8  | 287.0                       | ± | 101.5 |
|         | 2.45      | 1    | 2.5                     | ± | 5.0   | 300.0                   | ± | 16.8  | 302.5                       | ± | 11.9  |
|         |           | 2    | >1365                   |   |       | Unknown                 |   |       | No Steady State Film        |   |       |
|         | 5.02      | --   | >1365                   |   |       | Unknown                 |   |       | No Steady State Film        |   |       |
|         | 7.49      | --   | >1365                   |   |       | Unknown                 |   |       | No Steady State Film        |   |       |
|         | 10.15     | --   | >1365                   |   |       | Unknown                 |   |       | No Steady State Film        |   |       |
| Blend 2 | 1.22      | --   | 30.0                    | ± | 14.6  | 56.0                    | ± | 35.6  | 86.0                        | ± | 42.3  |
|         | 2.45      | --   | 32.0                    | ± | 11.5  | 81.0                    | ± | 51.6  | 113.0                       | ± | 60.6  |
|         | 5.02      | --   | 70.0                    | ± | 60.4  | 134.0                   | ± | 57.7  | 204.0                       | ± | 46.7  |
|         | 7.49      | --   | 57.0                    | ± | 28.2  | 196.0                   | ± | 48.3  | 253.0                       | ± | 41.3  |
|         | 10.15     | 1    | 103.8                   | ± | 31.2  | 181.3                   | ± | 24.3  | 285.0                       | ± | 10.8  |
|         |           | 2    | 264.0                   | ± | 113.9 | 499.0                   | ± | 266.0 | 763.0                       | ± | 237.8 |
| Blend 3 | 1.22      | --   | 32.0                    | ± | 11.0  | 21.0                    | ± | 8.2   | 53.0                        | ± | 6.7   |
|         | 2.45      | --   | 35.0                    | ± | 13.7  | 69.0                    | ± | 40.4  | 104.0                       | ± | 42.3  |
|         | 5.02      | --   | 59.0                    | ± | 23.3  | 135.0                   | ± | 73.9  | 194.0                       | ± | 64.2  |
|         | 7.49      | --   | 56.0                    | ± | 24.6  | 195.0                   | ± | 34.8  | 251.0                       | ± | 47.1  |
|         | 10.15     | --   | 80.0                    | ± | 32.0  | 283.0                   | ± | 96.0  | 363.0                       | ± | 71.5  |
| Blend 4 | 1.22      | --   | 1.0                     | ± | 2.2   | Unknown                 |   |       | No Steady State Film        |   |       |
|         | 2.45      | --   | >1365                   |   |       | Unknown                 |   |       | No Steady State Film        |   |       |
|         | 5.02      | --   | >1365                   |   |       | Unknown                 |   |       | No Steady State Film        |   |       |
|         | 7.49      | --   | >1365                   |   |       | Unknown                 |   |       | No Steady State Film        |   |       |
|         | 10.15     | --   | >1365                   |   |       | Unknown                 |   |       | No Steady State Film        |   |       |
| Blend 5 | 1.22      | --   | 224.0                   | ± | 204.9 | Unknown                 |   |       | No Steady State Film        |   |       |
|         | 2.45      | --   | >1365                   |   |       | Unknown                 |   |       | No Steady State Film        |   |       |
|         | 5.02      | --   | >1365                   |   |       | Unknown                 |   |       | No Steady State Film        |   |       |
|         | 7.49      | --   | >1365                   |   |       | Unknown                 |   |       | No Steady State Film        |   |       |
|         | 10.15     | --   | >1365                   |   |       | Unknown                 |   |       | No Steady State Film        |   |       |
| Blend 6 | 1.22      | --   | 2.0                     | ± | 2.7   | 86.0                    | ± | 117.1 | 88.0                        | ± | 116.0 |
|         | 2.45      | --   | 10.0                    | ± | 10.0  | 42.0                    | ± | 12.0  | 52.0                        | ± | 16.4  |
|         | 5.02      | --   | 51.0                    | ± | 4.2   | 417.0                   | ± | 134.9 | 468.0                       | ± | 134.3 |
|         | 7.49      | 1    | 47.5                    | ± | 15.5  | 431.3                   | ± | 51.2  | 478.8                       | ± | 61.2  |
|         |           | 2    | 35.0                    | ± | 24.8  | 1043.8                  | ± | 196.5 | 1078.8                      | ± | 200.1 |
|         | 10.15     | --   | 67.0                    | ± | 9.7   | 849.0                   | ± | 189.3 | 916.0                       | ± | 194.0 |
| Blend 7 | 1.22      | --   | 0.0                     | ± | 0.0   | 20.0                    | ± | 18.4  | 20.0                        | ± | 18.4  |
|         | 2.45      | --   | 0.0                     | ± | 0.0   | 36.0                    | ± | 15.6  | 36.0                        | ± | 15.6  |
|         | 5.02      | --   | 11.0                    | ± | 16.7  | 374.0                   | ± | 226.3 | 385.0                       | ± | 238.1 |
|         | 7.49      | 1    | 141.3                   | ± | 58.4  | 321.3                   | ± | 106.8 | 462.5                       | ± | 72.9  |
|         |           | 2    | 40.0                    | ± | 26.8  | 970.0                   | ± | 250.4 | 1010.0                      | ± | 255.6 |
|         | 10.15     | 1    | 364.0                   | ± | 207.3 | 646.0                   | ± | 218.9 | 1010.0                      | ± | 259.4 |
|         |           | 2    | 315.0                   | ± | 122.2 | Unknown                 |   |       | No Steady State Film        |   |       |
